# Supplementary material for: Bifunctional TiO2/Ag3PO4/graphene composites with superior visible light photocatalytic performance and synergistic inactivation of bacteria
Source: Royal Society of Chemistry journal article supplement (doi:10.1039/c4ra01559b), 2014-01-01
Supplement: c4ra01559b1.pdf [file c4ra01559b1.pdf]

## Electronic Supplementary Information

### Bifunctional $\text{TiO}_2/\text{Ag}_3\text{PO}_4/\text{Graphene}$ composites with superior visible light photocatalytic performance and synergistic inactivation of bacteria

Xiaofei Yang,<sup>a,\*</sup> Jieling Qin,<sup>a</sup> Yan Jiang,<sup>a</sup> Rong Li,<sup>a</sup> Yang Li,<sup>a</sup> and Hua Tang<sup>a,\*</sup>

<sup>a</sup> School of Materials Science and Engineering, Jiangsu University, Zhenjiang 212013, China

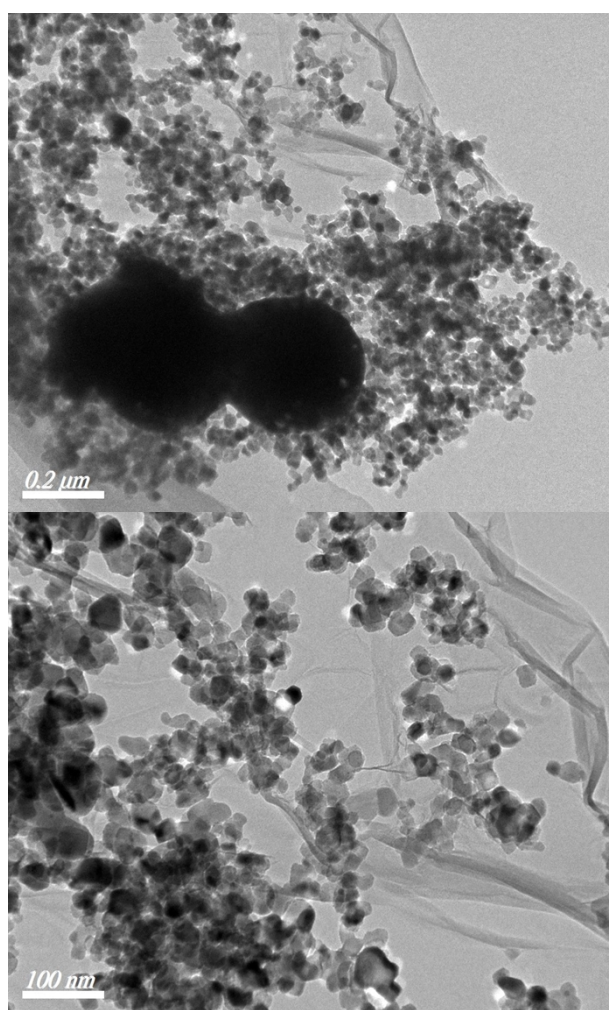

**Fig. S1** TEM image of  $\text{TiO}_2/\text{Ag}_3\text{PO}_4/\text{GR}$  composites where larger particles represent  $\text{Ag}_3\text{PO}_4$  and smaller particles stand for nanosized  $\text{TiO}_2$  (top); wrinkled graphene sheets were clearly observed in the enlarged image (bottom).

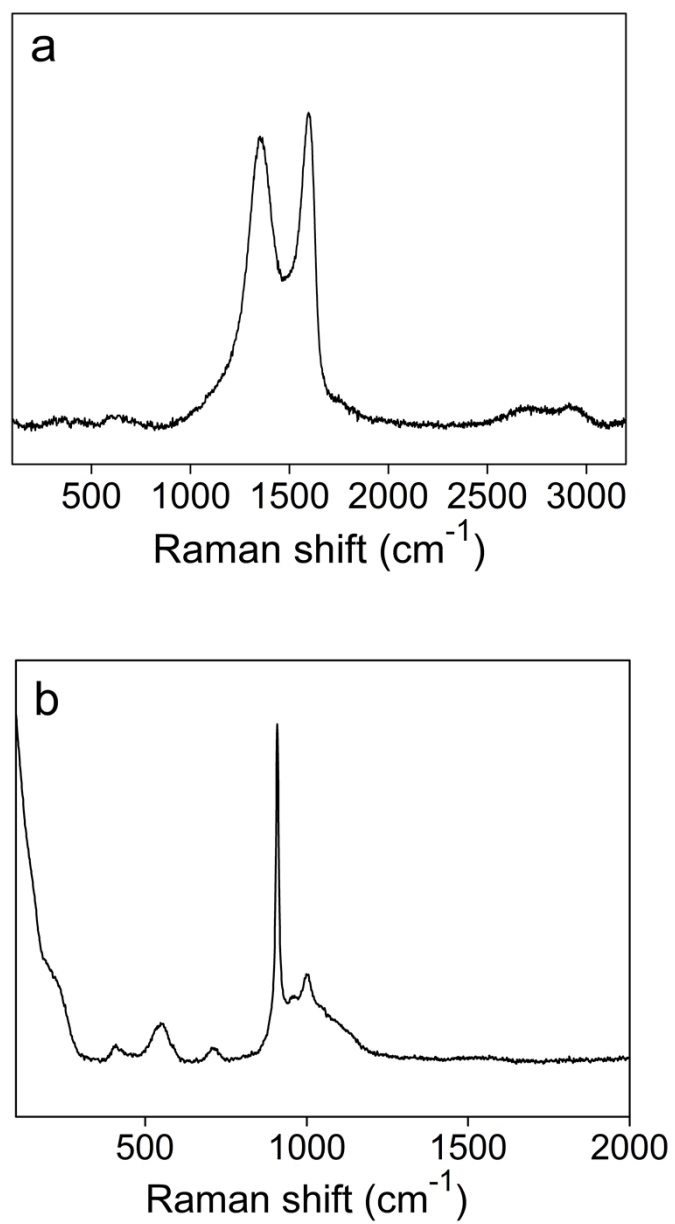

**Fig. S2** Raman spectra of GO (a),  $\text{Ag}_3\text{PO}_4$  (b)

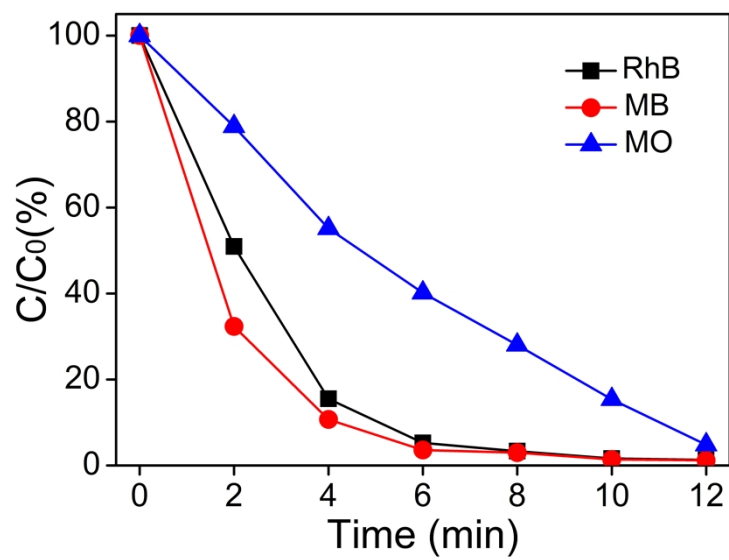

**Fig. S3** Visible light photocatalytic activities of the S0.8 toward different dye molecules.

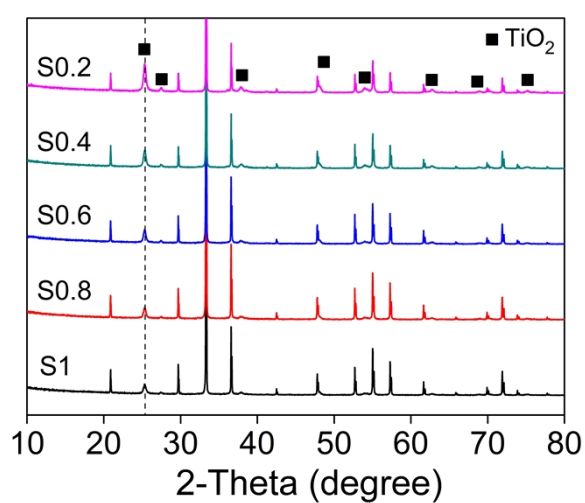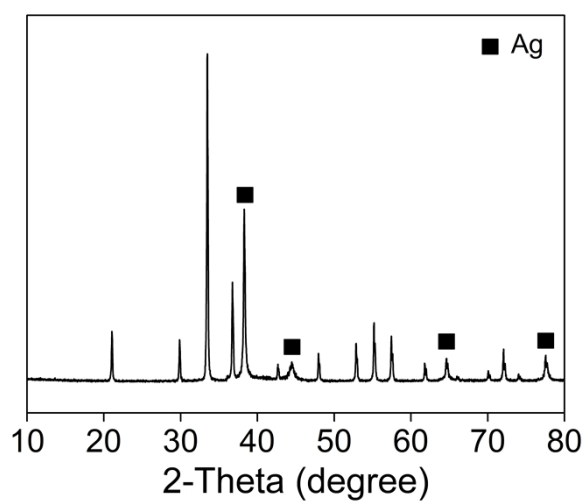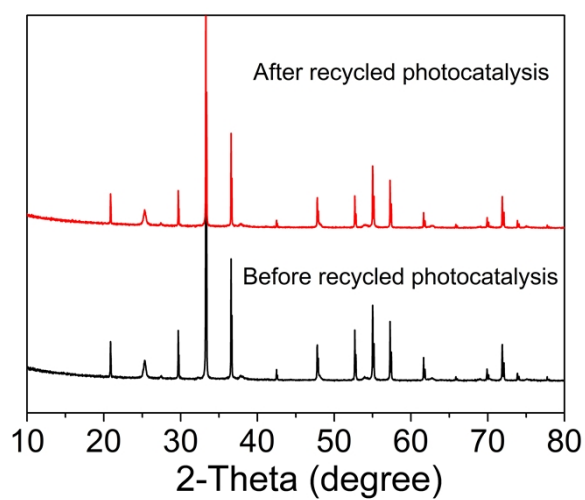

**Fig. S4** XRD patterns of (top) TiO<sub>2</sub>/Ag<sub>3</sub>PO<sub>4</sub>/GR samples; (middle) recycled Ag<sub>3</sub>PO<sub>4</sub> ; (bottom) TiO<sub>2</sub>/Ag<sub>3</sub>PO<sub>4</sub>/GR composites before and after recycled photocatalysis.

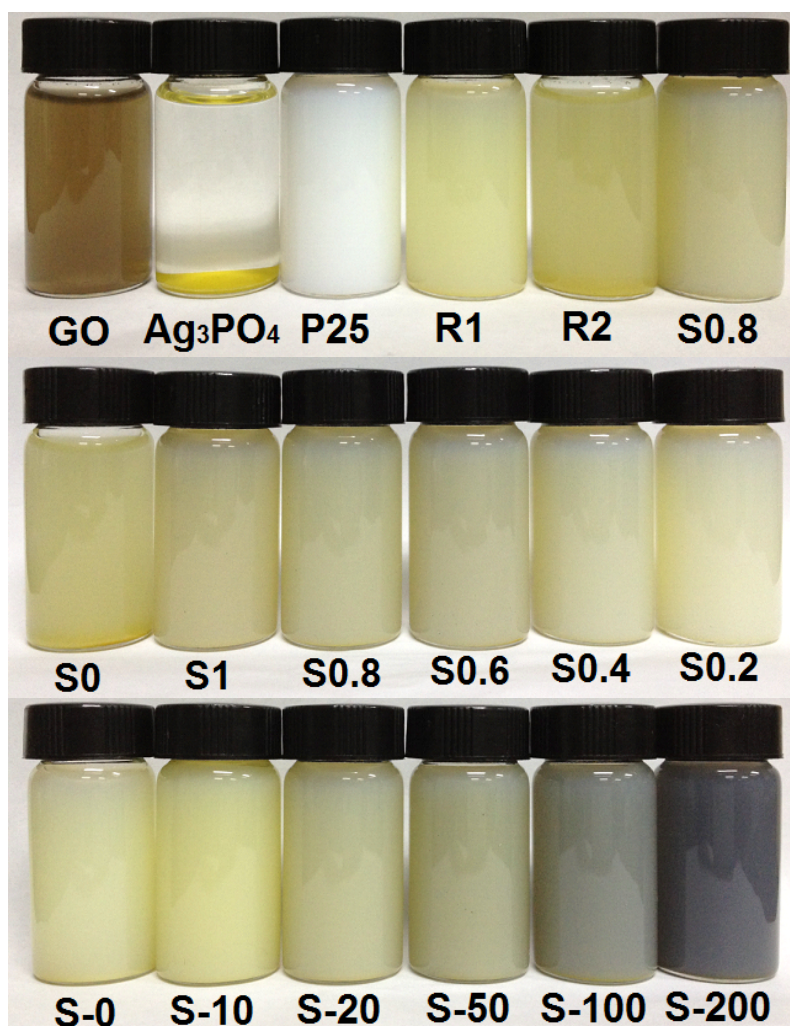

**Fig. S5** Digital photos of different aqueous dispersions 24 h after ultrasonication. R1 represents GO/TiO<sub>2</sub> and R2 stands for GO/Ag<sub>3</sub>PO<sub>4</sub> while other samples are composites indicated in Table 1. The results indicate that all the composites exhibit better solubility than bare Ag<sub>3</sub>PO<sub>4</sub>.
